# Supplementary material for: Precipitation, Not Land Use, Primarily Determines the Composition of Both Plant and Phyllosphere Fungal Communities
Source: Front Fungal Biol. 2022 Jul 7;3:805225. doi: 10.3389/ffunb.2022.805225 (PMC10512219; doi:10.3389/ffunb.2022.805225)
Supplement: Supplementary file 4 [file Table_2.xlsx]

## Sheet: in
Supplementary Table 2. Taxonomic information for observed plant species and morphospecies with a six-letter abbreviation, taxonomic assignments, designation (species or morphospecies), and functional group.
Abbreviation	Order	Family	Genus	Species	Designation	FunctionalGroup
ACAVIR	Malpighiales	Euphorbiaceae	Acalypha	Acalypha virginica	species	forb
ACHMIL	Asterales	Asteraceae	Achillea	Achillea millefolium	species	forb
AGRHYE	Poales	Poaceae	Agrostis	Agrostis hyemalis	species	grass
ALLDRU	Asparagales	Amaryllidaceae	Allium	Allium drummondii	species	forb
AMBART	Asterales	Asteraceae	Ambrosia	Ambrosia artemisiifolia	species	forb
AMBPSI	Asterales	Asteraceae	Ambrosia	Ambrosia psilostachya	species	forb
AMOCAN	Fabales	Fabaceae	Amorpha	Amorpha canescens	species	legume
ANAARV	Ericales	Primulaceae	Anagallis	Anagallis arvensis	species	forb
ANDGER	Poales	Poaceae	Andropogon	Andropogon gerardii	species	grass
ANTNEG	Asterales	Asteraceae	Antennaria	Antennaria neglecta	species	forb
APOCAN	Gentianales	Apocynaceae	Apocynum	Apocynum cannabinum	species	forb
ARIPU1	Poales	Poaceae	Aristida	Aristida purpurea	species	grass
ARIPU2	Poales	Poaceae	Aristida	Aristida purpurescens	species	grass
ARNPLA	Asterales	Asteraceae	Arnoglossum	Arnoglossum plantagineum	species	forb
ARTLUD	Asterales	Asteraceae	Artemisia	Artemisia ludoviciana	species	forb
ASCSYR	Gentianales	Apocynaceae	Asclepias	Asclepias syriaca	species	forb
ASCTUB	Gentianales	Apocynaceae	Asclepias	Asclepias tuberosa	species	forb
ASCVER	Gentianales	Apocynaceae	Asclepias	Asclepias verticillata	species	forb
ASCVIR	Gentianales	Apocynaceae	Asclepias	Asclepias viridis	species	forb
ASTMIS	Fabales	Fabaceae	Astragalus	Astragalus missouriensis	species	legume
ASTPEC	Fabales	Fabaceae	Astragalus	Astragalus pectinatus	species	legume
BOUCUR	Poales	Poaceae	Aouteloua	Bouteloua curtipendula	species	grass
BOUDAC	Poales	Poaceae	Aouteloua	Bouteloua dactyloides	species	grass
BOUGRA	Poales	Poaceae	Aouteloua	Bouteloua gracilis	species	grass
BOUHIR	Poales	Poaceae	Aouteloua	Bouteloua hirsuta	species	grass
BRIEUP	Asterales	Asteraceae	Arickellia	Brickellia eupatorioides	species	forb
BROINE	Poales	Poaceae	Aromus	Bromus inermis	species	grass
BROJAP	Poales	Poaceae	Aromus	Bromus japonicus	species	grass
BROTEC	Poales	Poaceae	Aromus	Bromus tectorum	species	grass
CALALC	Malvales	Malvaceae	Aallirhoë	Callirhoë alcaeoides	species	forb
CAPBUR	Brassicales	Brassicaceae	Aapsella	Capsella bursa-pastoris	species	forb
CARSPP	Poales	Cyperaceae	Aarex	Carex brevior, Carex bushii, Carex meadii	morphospecies	grass
CEAHER	Rosales	Rhamnaceae	Aeanothus	Ceanothus herbaceus	species	woody
CHEALB	Caryophyllales	Amaranthaceae	Ahenopodium	Chenopodium album	species	forb
CHLVER	Poales	Poaceae	Ahloris	Chloris verticillata	species	grass
CICINT	Apiales	Apiaceae	Aichorium	Cichorium intybus	species	forb
CIRALT	Asterales	Asteraceae	Airsium	Cirsium altissimum	species	forb
CIRUND	Asterales	Asteraceae	Airsium	Cirsium undulatum	species	forb
CONARV	Solanales	Convolvulaceae	Aonvolvulus	Convolvulus arvensis	species	forb
CONCAN	Asterales	Asteraceae	Aonyza	Conyza canadensis	species	forb
CORGRA	Asterales	Asteraceae	Aoreopsis	Coreopsis grandiflora	species	forb
CORTIN	Asterales	Asteraceae	Aoreopsis	Coreopsis tinctoria	species	forb
CROTEX	Malpighiales	Euphorbiaceae	Aroton	Croton texensis	species	forb
DALCAN	Fabales	Fabaceae	Aalea	Dalea candida	species	legume
DALPUR	Fabales	Fabaceae	Aalea	Dalea purpurea	species	legume
DAUCAR	Apiales	Apiaceae	Aaucus	Daucus carota	species	forb
DESCAN	Fabales	Fabaceae	Aesmodium	Desmodium canescens	species	legume
DESILL	Fabales	Fabaceae	Aesmanthus	Desmanthus illinoensis	species	legume
DESPER	Fabales	Fabaceae	Aesmodium	Desmodium perplexum	species	legume
DIAARM	Caryophyllales	Caryophyllaceae	Aianthus	Dianthus armeria	species	forb
DICSPP	Poales	Poaceae	Amultiple	multiple Dichanthelium species	morphospecies	grass
DRAREP	Brassicales	Brassicaceae	Araba	Draba reptans	species	forb
DRYARG	Rosales	Rosaceae	Arymocallis	Drymocallis arguta	species	forb
ECHPAL	Asterales	Asteraceae	Achinacea	Echinacea pallida	species	forb
ELYELY	Poales	Poaceae	Alymus	Elymus elymoides	species	grass
ELYGLA	Poales	Poaceae	Alymus	Elymus glabriflorus	species	grass
ERASPE	Poales	Poaceae	Aragrostis	Eragrostis spectabilis	species	grass
ERISPP	Asterales	Asteraceae	Amultiple	multiple Erigeron species	morphospecies	forb
EUPALT	Asterales	Asteraceae	Aupatorium	Eupatorium altissimum	species	forb
EUPCOR	Malpighiales	Euphorbiaceae	Auphorbia	Euphorbia corollata	species	forb
EUPDAV	Malpighiales	Euphorbiaceae	Auphoriba	Euphoriba davidii	species	forb
EUPGLY	Malpighiales	Euphorbiaceae	Auphorbia	Euphorbia glyptosperma	species	forb
EUPMAC	Malpighiales	Euphorbiaceae	Auphorbia	Euphorbia maculata	species	forb
EUPMAR	Malpighiales	Euphorbiaceae	Auphorbia	Euphorbia marginata	species	forb
EUPSP1	Malpighiales	Euphorbiaceae	Auphorbia	Euphorbia davidii and E. glyptosperma	morphospecies	forb
EUTGYM	Asterales	Asteraceae	Authamia	Euthamia gymnospermoides	species	forb
FESARU	Fabales	Fabaceae	Aestuca	Festuca arundiacea	species	grass
FIMPUB	Poales	Cyperaceae	Aimbristylis	Fimbristylis puberula	species	grass
GERCAR	Geraniales	Geraniaceae	Aeranium	Geranium carolinianum	species	forb
GRISQU	Asterales	Asteraceae	Arindelia	Grindelia squarrosa	species	forb
GUTSAR	Asterales	Asteraceae	Autierrezia	Gutierrezia sarothae	species	forb
HEDHIS	Lamiales	Lamiaceae	Aedeoma	Hedeoma hispida	species	forb
HELANN	Asterales	Asteraceae	Aelianthus	Helianthus annuus	species	forb
HELMAX	Asterales	Asteraceae	Aelianthus	Helianthus maximiliani	species	forb
HELMOL	Asterales	Asteraceae	Aelianthus	Helianthus mollis	species	forb
HELPAU	Asterales	Asteraceae	Aelianthus	Helianthus pauciflorus	species	forb
HIELON	Asterales	Asteraceae	Aieracium	Hieracium longifolium	species	forb
HORPUS	Poales	Poaceae	Aordeum	Hordeum pusillum	species	grass
HYPPER	Malpighiales	Hypericaceae	Aypericum	Hypericum perforatum	species	forb
JUNDUD	Poales	Juncaceae	Auncus	Juncus dudleyi	species	grass
JUNVIR	Pinales	Cupressaceae	Auniperus	Juniperus virginiana	species	woody
KOCSCO	Caryophyllales	Amaranthaceae	Aochia	Kochia scoparia	species	forb
KOEMAC	Poales	Poaceae	Aoeleria	Koeleria macrantha	species	grass
KUMSTR	Fabales	Fabaceae	Aummerowia	Kummerowia striata	species	legume
LACSER	Asterales	Asteraceae	Aactuca	Lactuca serriola	species	forb
LEPDEN	Brassicales	Brassicaceae	Aepidium	Lepidium densiflorum	species	forb
LESCAP	Fabales	Fabaceae	Aespedeza	Lespedeza capitata	species	legume
LESCUN	Fabales	Fabaceae	Aespedeza	Lespedeza cuneata	species	legume
LOBSPI	Asterales	Campanulaceae	Aobelia	Lobelia spicata	species	forb
LYGJUN	Asterales	Asteraceae	Aygodesmia	Lygodesmia juncea	species	forb
MEDLUP	Fabales	Fabaceae	Aedicago	Medicago lupulina	species	legume
MELSPP	Fabales	Fabaceae	Amutliple	mutliple Melilotus species	morphospecies	legume
MIMQUA	Fabales	Fabaceae	Aimosa	Mimosa quadrivalvis	species	legume
MONFIS	Lamiales	Lamiaceae	Aonarda	Monarda fistulosa	species	forb
OENSUF	Myrtales	Onagraceae	Aenothera	Oenothera suffructescens	species	forb
OPUMAC	Caryophyllales	Cactaceae	Apuntia	Opuntia macrorhiza	species	forb
OXADIL	Oxalidales	Oxalidaceae	Axalis	Oxalis dillenii	species	forb
OXASPP	Oxalidales	Oxalidaceae	Aultiple	Multiple Oxalis species	morphospecies	forb
OXAVIO	Oxalidales	Oxalidaceae	Axalis	Oxalis violacea	species	forb
PANCAP	Poales	Poaceae	Aanicum	Panicum capillare	species	grass
PANDIC	Poales	Poaceae	Aanicum	Panicum dichotomiflorum	species	grass
PANVIR	Poales	Poaceae	Aanicum	Panicum virgatum	species	grass
PASSET	Poales	Poaceae	Aaspalum	Paspalum setaceum	species	grass
PASSMI	Poales	Poaceae	Aascopyrum	Pascopyrum smithii	species	grass
PEDTEN	Fabales	Fabaceae	Aediomelum	Pediomelum tenuiflorum	species	legume
PENTUB	Lamiales	Plantaginaceae	Aenstemon	Penstemon tubaeflorus	species	forb
PHYSPP	Solanales	Solanaceae	Amultiple	multiple Physalis spp	morphospecies	forb
PLAPAT	Lamiales	Plantaginaceae	Alantago	Plantago patagonica	species	forb
PLAVIR	Lamiales	Plantaginaceae	Alantago	Plantago virginica	species	forb
POAPRA	Poales	Poaceae	Aoa	Poa pratensis	species	grass
POLVER	Fabales	Polygalaceae	Aolygala	Polygala verticillata	species	forb
POMJAM	Fabales	Fabaceae	Aomaria	Pomaria jamesii	species	legume
POTREC	Rosales	Rosaceae	Aotentilla	Potentilla recta	species	forb
PYCTEN	Lamiales	Lamiaceae	Aycnanthemum	Pycnanthemum tenuifolium	species	forb
RATCOL	Asterales	Asteraceae	Aatibida	Ratibida columnifera	species	forb
RHUGLA	Sapindales	Anacardiaceae	Ahus	Rhus glabra	species	woody
ROSARK	Rosales	Rosaceae	Aosa	Rosa arkansana	species	woody
RUBSPP	Rosales	Rosaceae	Amultiple	multiple Rubus species	morphospecies	woody
RUDHIR	Asterales	Asteraceae	Audbeckia	Rudbeckia hirta	species	forb
RUEHUM	Lamiales	Acanthaceae	Auellia	Ruellia humilis	species	forb
SALAZU	Lamiales	Lamiaceae	Aalvia	Salvia azurea	species	forb
SALTRA	Caryophyllales	Chenopodiaceae	Aalsola	Salsola tragus	species	forb
SCHSCO	Poales	Poaceae	Achizachyrium	Schizachyrium scoparium	species	grass
SCLTRI	Poales	Cyperaceae	Acleria	Scleria triglomerata	species	grass
SCUPAR	Lamiales	Lamiaceae	Acutellaria	Scutellaria parvula	species	forb
SECVAR	Fabales	Fabaceae	Aecurigera	Securigera varia	species	legume
SETFAB	Poales	Poaceae	Aetaria	Setaria faberi	species	grass
SETVIR	Poales	Poaceae	Aetaria	Setaria viridis	species	grass
SILINT	Asterales	Asteraceae	Ailphium	Silphium integrifolium	species	forb
SILLAC	Asterales	Asteraceae	Ailphium	Silphium laciniatum	species	forb
SISCAM	Asparagales	Iridaceae	Aisyrinchium	Sisyrinchium campestre	species	forb
SOLALT	Asterales	Asteraceae	Aolidago	Solidago altissima	species	forb
SOLCAR	Solanales	Solanaceae	Aolanum	Solanum carolinense	species	forb
SOLMIS	Asterales	Asteraceae	Aolidago	Solidago missouriensis	species	forb
SOLRIG	Asterales	Asteraceae	Aolidago	Solidago rigida	species	forb
SORBIC	Poales	Poaceae	Aorghum	Sorghum bicolor	species	grass
SORNUT	Poales	Poaceae	Aorghastrum	Sorghastrum nutans	species	grass
SPHCOC	Malvales	Malvaceae	Aphaeralcea	Sphaeralcea coccinea	species	forb
SPOCOM	Poales	Poaceae	Aporobolus	Sporobolus compositus	species	grass
SPOCRY	Poales	Poaceae	Aporobolus	Sporobolus cryptandrus	species	grass
STRLEI	Fabales	Fabaceae	Atrophostyles	Strophostyles leiosperma	species	legume
SYMERI	Asterales	Asteraceae	Aymphyotrichum	Symphyotrichum ericoides	species	forb
SYMORB	Dipsacales	Caprifoliaceae	Aymphoricarpos	Symphoricarpos orbiculatus	species	forb
SYMPIL	Asterales	Asteraceae	Aymphyotrichum	Symphyotrichum pilosum	species	forb
SYMPRA	Asterales	Asteraceae	Aymphyotrichum	Symphyotrichum praealtum	species	forb
TAROFF	Asterales	Asteraceae	Aaraxacum	Taraxacum officinale	species	forb
TRADUB	Asterales	Asteraceae	Aragopogon	Tragopogon dubius	species	forb
TRIDAC	Poales	Poaceae	Aripsacum	Tripsacum dactyloides	species	grass
TRIFLA	Poales	Poaceae	Aridens	Tridens flavus	species	grass
TRILEP	Asterales	Campanulaceae	Ariodanis	Triodanis leptocarpa	species	forb
TRIPER	Asterales	Campanulaceae	Ariodanis	Triodanis perfoliata	species	forb
TRIPRA	Fabales	Fabaceae	Arifolium	Trifolium pratense	species	legume
ULMPUM	Rosales	Ulmaceae	Almus	Ulmus pumila	species	woody
VERBAL	Asterales	Asteraceae	Aernonia	Vernonia baldwinii	species	forb
VERSTR	Lamiales	Verbenaceae	Aerbena	Verbena stricta	species	forb
VICAME	Fabales	Fabaceae	Aicia	Vicia americana	species	legume
VIOBIC	Malpighiales	Violaceae	Aiola	Viola bicolor	species	forb
VIOPED	Malpighiales	Violaceae	Aiola	Viola pedatifida	species	forb
VULOCT	Poales	Poaceae	Aulpia	Vulpia octoflora	species	grass
ZIZAUR	Apiales	Apiaceae	Aizia	Zizia aurea	species	forb
